# Supplementary material for: Photoperiod controls vegetation phenology across Africa
Source: PubMed Central journal article supplement (PMC6814729; doi:10.1038/s42003-019-0636-7), 2019-10-25
Supplement: 42003_2019_636_MOESM1_ESM.pdf [file 42003_2019_636_MOESM1_ESM.pdf]

## Supplementary Information for

### Photoperiod controls vegetation phenology across Africa

#### Supplementary information

Supplementary Table 1: Partial correlation coefficients between SOS and cumulative climatic drivers in the northern latitudes of Africa summed over a 90 day period in a step of 10 days (\* means significant at  $P < 0.05$ )

| Northern Africa |           |        |        |       |            |        |        |       |            |       |        |       |           |       |       |       |
|-----------------|-----------|--------|--------|-------|------------|--------|--------|-------|------------|-------|--------|-------|-----------|-------|-------|-------|
| Preseason       | Croplands |        |        |       | Grasslands |        |        |       | Shrublands |       |        |       | Woodlands |       |       |       |
|                 | Rain      | Solar  | Temp   | Photo | Rain       | Solar  | Temp   | Photo | Rain       | Solar | Temp   | Photo | Rain      | Solar | Temp  | Photo |
| 10              | 0.35*     | 0.12   | -0.35* | 0.71* | 0.25*      | -0.37* | -0.46* | 0.51* | 0.06       | -0.00 | -0.19* | 0.97* | 0.24*     | 0.29* | 0.16* | 0.77* |
| 20              | 0.40*     | 0.08   | -0.33* | 0.79* | 0.23*      | -0.43* | -0.45* | 0.53* | 0.11       | -0.08 | -0.28* | 0.96* | 0.32*     | 0.31* | 0.15* | 0.69* |
| 30              | 0.42*     | -0.07  | -0.34* | 0.87* | 0.34*      | -0.50* | -0.38* | 0.69* | 0.20*      | -0.11 | -0.39* | 0.95* | 0.30*     | 0.31* | 0.10* | 0.66* |
| 40              | 0.47*     | -0.23* | -0.24* | 0.93* | 0.36*      | -0.52* | -0.35* | 0.78* | 0.24*      | -0.02 | -0.39* | 0.93* | 0.24*     | 0.30* | 0.09* | 0.65* |
| 50              | 0.48*     | -0.29* | -0.19* | 0.95* | 0.36*      | -0.53* | -0.36* | 0.81* | 0.28*      | -0.01 | -0.39* | 0.92* | 0.23*     | 0.28* | 0.11* | 0.64* |
| 60              | 0.46*     | -0.33* | -0.14* | 0.96* | 0.34*      | -0.52* | -0.37* | 0.85* | 0.31*      | -0.01 | -0.40* | 0.90* | 0.10      | 0.22* | 0.16* | 0.66* |
| 70              | 0.47*     | -0.34* | -0.11* | 0.97* | 0.34*      | -0.52* | -0.34* | 0.88* | 0.32*      | -0.02 | -0.42* | 0.87* | 0.06      | 0.24* | 0.12* | 0.66* |
| 80              | 0.47*     | -0.39* | -0.05  | 0.98* | 0.34*      | -0.51* | -0.33* | 0.92* | 0.33*      | -0.10 | -0.45* | 0.84* | 0.05      | 0.24* | 0.12* | 0.66* |
| 90              | 0.46*     | -0.40* | -0.05  | 0.98* | 0.33*      | -0.50* | -0.34* | 0.93* | 0.32*      | -0.09 | -0.45* | 0.81* | -0.02     | 0.22* | 0.14* | 0.70* |

Supplementary Table 2: Partial correlation coefficients between SOS and cumulative climatic drivers in the southern latitudes of Africa summed over a 90 day period in a step of 10 days (\* means significant at  $P < 0.05$ )

| Southern Africa |                           |       |        |        |            |       |        |       |            |       |        |       |           |       |        |       |
|-----------------|---------------------------|-------|--------|--------|------------|-------|--------|-------|------------|-------|--------|-------|-----------|-------|--------|-------|
| Preseason       | Croplands (South-western) |       |        |        | Grasslands |       |        |       | Shrublands |       |        |       | Woodlands |       |        |       |
|                 | Rain                      | Solar | Temp   | Photo  | Rain       | Solar | Temp   | Photo | Rain       | Solar | Temp   | Photo | Rain      | Solar | Temp   | Photo |
| 10              | 0.13                      | 0.10  | -0.16* | -0.96* | 0.07       | 0.02  | -0.42* | 0.98* | -0.13      | 0.27* | 0.07   | 0.92* | -0.01     | 0.03  | -0.06  | 0.95* |
| 20              | 0.12                      | 0.03  | -0.15* | -0.96* | 0.13       | 0.01  | -0.34* | 0.98* | -0.12      | 0.17* | 0.12   | 0.94* | -0.04     | 0.19* | -0.19* | 0.96* |
| 30              | 0.11                      | 0.04  | -0.15* | -0.96* | 0.16*      | 0.01  | -0.27* | 0.98* | -0.13      | 0.16* | 0.11   | 0.94* | -0.09     | 0.28* | -0.13  | 0.96* |
| 40              | 0.11                      | 0.05  | -0.16* | -0.96* | 0.28*      | 0.04  | 0.01   | 0.98* | -0.14      | 0.19* | 0.06   | 0.95* | -0.14     | 0.31* | -0.03  | 0.97* |
| 50              | 0.08                      | 0.04  | -0.12  | -0.96* | 0.32*      | 0.13  | 0.09   | 0.98* | -0.11      | 0.24* | -0.02  | 0.96* | -0.14     | 0.30* | -0.05  | 0.93* |
| 60              | 0.10                      | 0.05  | -0.10  | -0.96* | 0.34*      | 0.06  | 0.36*  | 0.98* | -0.14      | 0.29* | -0.07  | 0.97* | -0.11     | 0.28* | -0.19* | 0.92* |
| 70              | 0.03                      | 0.05  | -0.11  | -0.96* | 0.33*      | 0.03  | 0.15*  | 0.98* | -0.08      | 0.35* | -0.13  | 0.98* | -0.05     | 0.30* | -0.15* | 0.91* |
| 80              | 0.05                      | 0.03  | -0.11  | -0.96* | 0.32*      | 0.02  | 0.17*  | 0.98* | -0.04      | 0.37* | -0.24* | 0.98* | -0.00     | 0.42* | -0.21* | 0.90* |
| 90              | 0.10                      | 0.07  | -0.08  | -0.96* | 0.33*      | 0.06  | 0.21*  | 0.98* | -0.09      | 0.38* | -0.26* | 0.99* | -0.01     | 0.39* | -0.28* | 0.86* |

Supplementary Table 3: Partial correlation coefficients between SOS and cumulative climatic drivers in the extreme north of Africa summed over a 90 day period in a step of 10 days (\* means significant at  $P < 0.05$ )

| Extreme North |           |        |       |        |            |       |       |        |  |
|---------------|-----------|--------|-------|--------|------------|-------|-------|--------|--|
| Preseason     | Croplands |        |       |        | Shrublands |       |       |        |  |
|               | Rain      | Solar  | Temp  | Photo  | Rain       | Solar | Temp  | Photo  |  |
| 10            | -0.08     | -0.08  | 0.35* | -0.97* | 0.26*      | 0.07  | 0.42* | -0.98* |  |
| 20            | -0.08     | -0.09  | 0.34* | -0.98* | 0.23*      | -0.02 | 0.48* | -0.98* |  |
| 30            | -0.04     | -0.10  | 0.31* | -0.98* | 0.24*      | -0.04 | 0.45* | -0.97* |  |
| 40            | -0.05     | -0.08  | 0.23* | -0.98* | 0.19*      | -0.07 | 0.37* | -0.97* |  |
| 50            | -0.06     | -0.12* | 0.13* | -0.98* | 0.20*      | -0.06 | 0.21* | -0.97* |  |
| 60            | 0.00      | -0.15* | 0.10* | -0.98* | 0.22*      | -0.02 | 0.08  | -0.97* |  |
| 70            | 0.05      | -0.17* | 0.07  | -0.99* | 0.25*      | -0.04 | 0.00  | -0.98* |  |
| 80            | 0.10*     | -0.20* | 0.06  | -0.99* | 0.26*      | -0.08 | -0.03 | -0.98* |  |
| 90            | 0.15*     | -0.22* | 0.08  | -0.99* | 0.28*      | -0.09 | -0.07 | -0.98* |  |

Supplementary Table 4: Partial correlation coefficients between EOS DOY and cumulative climatic drivers in the northern latitudes of Africa summed over a 90 day period in a step of 10 days while controlling for SOS (\* means significant at  $P < 0.05$ ).

| Preseason | Northern  |        |       |      |       |            |        |        |        |        |            |        |       |       |        |           |        |        |        |        |
|-----------|-----------|--------|-------|------|-------|------------|--------|--------|--------|--------|------------|--------|-------|-------|--------|-----------|--------|--------|--------|--------|
|           | Croplands |        |       |      |       | Grasslands |        |        |        |        | Shrublands |        |       |       |        | Woodlands |        |        |        |        |
|           | SOS       | Rain   | Solar | Temp | Photo | SOS        | Rain   | Solar  | Temp   | Photo  | SOS        | Rain   | Solar | Temp  | Photo  | SOS       | Rain   | Solar  | Temp   | Photo  |
| 10        | 0.36*     | -0.12* | 0.36* | 0.01 | 0.93* | 0.08       | -0.18* | -0.30* | 0.32*  | -0.86* | 0.66*      | -0.31* | 0.08  | 0.00  | -0.08  | 0.02      | -0.33* | 0.40*  | 0.29*  | -0.07  |
| 20        | 0.37*     | -0.19* | 0.35* | 0.02 | 0.92* | 0.12*      | -0.11* | -0.27* | 0.45*  | -0.86* | 0.64*      | -0.34* | 0.07  | -0.02 | -0.18* | 0.08      | -0.44* | 0.41*  | 0.09   | -0.12* |
| 30        | 0.39*     | -0.22* | 0.31* | 0.04 | 0.88* | 0.18*      | -0.01  | -0.31* | 0.29*  | -0.85* | 0.62*      | -0.34* | 0.07  | 0.01  | -0.27* | 0.13      | -0.51* | 0.30*  | 0.02   | -0.11* |
| 40        | 0.42*     | -0.24* | 0.28* | 0.04 | 0.83* | 0.17*      | 0.09   | -0.36* | 0.26*  | -0.87* | 0.60*      | -0.31* | 0.09  | -0.01 | -0.36* | 0.18*     | -0.55* | 0.18*  | -0.10* | -0.13* |
| 50        | 0.44*     | -0.25* | 0.27* | 0.04 | 0.75* | 0.18*      | 0.04   | -0.33* | 0.28*  | -0.87* | 0.57*      | -0.29* | 0.13  | 0.00  | -0.45* | 0.22*     | -0.62* | 0.09   | -0.21* | -0.15* |
| 60        | 0.47*     | -0.26* | 0.24* | 0.02 | 0.65* | 0.21*      | -0.22* | -0.18* | 0.15*  | -0.84* | 0.54*      | -0.29* | 0.16* | 0.03  | -0.52* | 0.22*     | -0.67* | 0.01   | -0.31* | -0.24* |
| 70        | 0.47*     | -0.29* | 0.20* | 0.00 | 0.51* | 0.18*      | -0.37* | -0.07* | 0.13*  | -0.83* | 0.50*      | -0.28* | 0.21* | 0.06  | -0.58* | 0.20*     | -0.68* | -0.14* | -0.38* | -0.40* |
| 80        | 0.44*     | -0.36* | 0.19* | 0.00 | 0.42* | 0.15*      | -0.33* | -0.16* | -0.11* | -0.87* | 0.46*      | -0.35* | 0.26* | 0.10  | -0.66* | 0.22*     | -0.67* | -0.14* | -0.39* | -0.50* |
| 90        | 0.39*     | -0.42* | 0.16* | 0.02 | 0.30* | 0.16*      | -0.29* | -0.14* | -0.19* | -0.87* | 0.45*      | -0.26* | 0.28* | 0.11  | -0.70* | 0.19*     | -0.66* | -0.15* | -0.39* | -0.58* |

Supplementary Table 5: Partial correlation coefficients between EOS DOY and cumulative climatic drivers in the southern latitudes of Africa summed over a 90 day period in a step of 10 days while controlling for SOS (\* means significant at  $P < 0.05$ ).

| Preseason | Southern                 |       |       |        |       |            |        |       |       |        |            |        |        |       |        |           |        |       |       |        |
|-----------|--------------------------|-------|-------|--------|-------|------------|--------|-------|-------|--------|------------|--------|--------|-------|--------|-----------|--------|-------|-------|--------|
|           | Croplands(South-western) |       |       |        |       | Grasslands |        |       |       |        | Shrublands |        |        |       |        | Woodlands |        |       |       |        |
|           | SOS                      | Rain  | Solar | Temp   | Photo | SOS        | Rain   | Solar | Temp  | Photo  | SOS        | Rain   | Solar  | Temp  | Photo  | SOS       | Rain   | Solar | Temp  | Photo  |
| 10        | 0.15*                    | -0.19 | 0.05  | -0.26* | 0.94* | -0.12      | -0.12* | 0.10* | 0.46* | -0.29* | -0.14*     | -0.16* | -0.39* | 0.44* | -0.44* | 0.19*     | -0.44* | -0.02 | 0.35* | -0.46* |
| 20        | 0.20*                    | -0.10 | 0.06  | -0.30* | 0.93* | -0.15      | -0.11* | 0.12* | 0.57* | -0.18* | -0.17*     | -0.10* | -0.40* | 0.53* | -0.56* | 0.12*     | -0.36* | -0.04 | 0.33* | -0.50* |
| 30        | 0.19*                    | -0.08 | 0.00  | -0.21* | 0.94* | -0.07      | -0.21* | 0.19* | 0.57* | -0.15* | -0.21*     | -0.16* | -0.36* | 0.57* | -0.70* | 0.19*     | -0.28* | -0.03 | 0.32* | -0.52* |
| 40        | 0.20*                    | -0.22 | 0.04  | -0.20* | 0.95* | 0.00       | -0.31* | 0.30* | 0.48* | -0.39* | -0.20*     | -0.16* | -0.31* | 0.57* | -0.75* | 0.19*     | -0.26* | -0.04 | 0.30* | -0.55* |
| 50        | 0.20*                    | -0.12 | 0.05  | -0.20* | 0.95* | 0.05       | -0.33* | 0.36* | 0.38* | -0.59* | -0.18*     | -0.15* | -0.28* | 0.61* | -0.82* | 0.16*     | -0.33* | -0.04 | 0.30* | -0.58* |
| 60        | 0.13*                    | -0.01 | 0.06  | -0.13* | 0.95* | 0.09       | -0.32* | 0.34* | 0.30* | -0.75* | -0.17*     | -0.17* | -0.28* | 0.65* | -0.87* | 0.13*     | -0.33* | -0.11 | 0.28* | -0.62* |
| 70        | 0.10*                    | 0.12  | 0.05  | -0.13* | 0.95* | 0.12       | -0.42* | 0.34* | 0.23* | -0.83* | -0.15*     | -0.10* | -0.28* | 0.70* | -0.91* | 0.12*     | -0.33* | -0.12 | 0.28* | -0.63* |
| 80        | 0.11*                    | 0.08  | 0.03  | -0.18* | 0.95* | 0.07       | -0.49* | 0.30* | 0.22* | -0.87* | -0.13*     | 0.04   | -0.29* | 0.76* | -0.94* | 0.11*     | -0.31* | -0.12 | 0.28* | -0.65* |
| 90        | 0.08                     | 0.13  | -0.01 | -0.24* | 0.96* | 0.02       | -0.54* | 0.25* | 0.25* | -0.91* | -0.14*     | 0.08   | -0.28* | 0.77* | -0.95* | 0.10*     | -0.30* | -0.09 | 0.29* | -0.68* |

Supplementary Table 6: Partial correlation coefficients between EOS and cumulative climatic drivers in the extreme north of Africa summed over a 90 day period in a step of 10 days, while controlling for SOS (\* means significant at  $P<0.05$ ).

| Extreme North |           |        |       |        |       |            |        |        |        |       |
|---------------|-----------|--------|-------|--------|-------|------------|--------|--------|--------|-------|
| Preseason     | Croplands |        |       |        |       | Shrublands |        |        |        |       |
|               | SOS       | Rain   | Solar | Temp   | Photo | SOS        | Rain   | Solar  | Temp   | Photo |
| 10            | -0.03     | -0.25* | -0.09 | -0.75* | 0.54* | 0.05       | -0.31* | -0.26* | -0.64* | 0.29* |
| 20            | -0.06     | -0.35* | 0.01  | -0.75* | 0.65* | 0.10*      | -0.30* | -0.24* | -0.69* | 0.05  |
| 30            | -0.06     | -0.39* | 0.07  | -0.72* | 0.73* | 0.20*      | -0.34* | -0.27* | -0.75* | 0.10  |
| 40            | -0.05     | -0.40* | 0.12* | -0.67* | 0.81* | 0.21*      | -0.38* | -0.08  | -0.72* | 0.26* |
| 50            | -0.04     | -0.36* | 0.18* | -0.65* | 0.87* | 0.19*      | -0.43* | 0.05   | -0.77* | 0.37* |
| 60            | -0.04     | -0.32* | 0.17* | -0.63* | 0.92* | 0.23*      | -0.42* | 0.18*  | -0.76* | 0.49* |
| 70            | -0.02     | -0.28* | 0.26* | -0.59* | 0.94* | 0.17*      | -0.40* | 0.29*  | -0.72* | 0.59* |
| 80            | -0.03     | -0.29* | 0.29* | -0.58* | 0.95* | 0.16*      | -0.38* | 0.32*  | -0.68* | 0.66* |
| 90            | -0.01     | -0.21* | 0.28* | -0.57* | 0.96* | 0.14*      | -0.36* | 0.37*  | -0.63* | 0.72* |

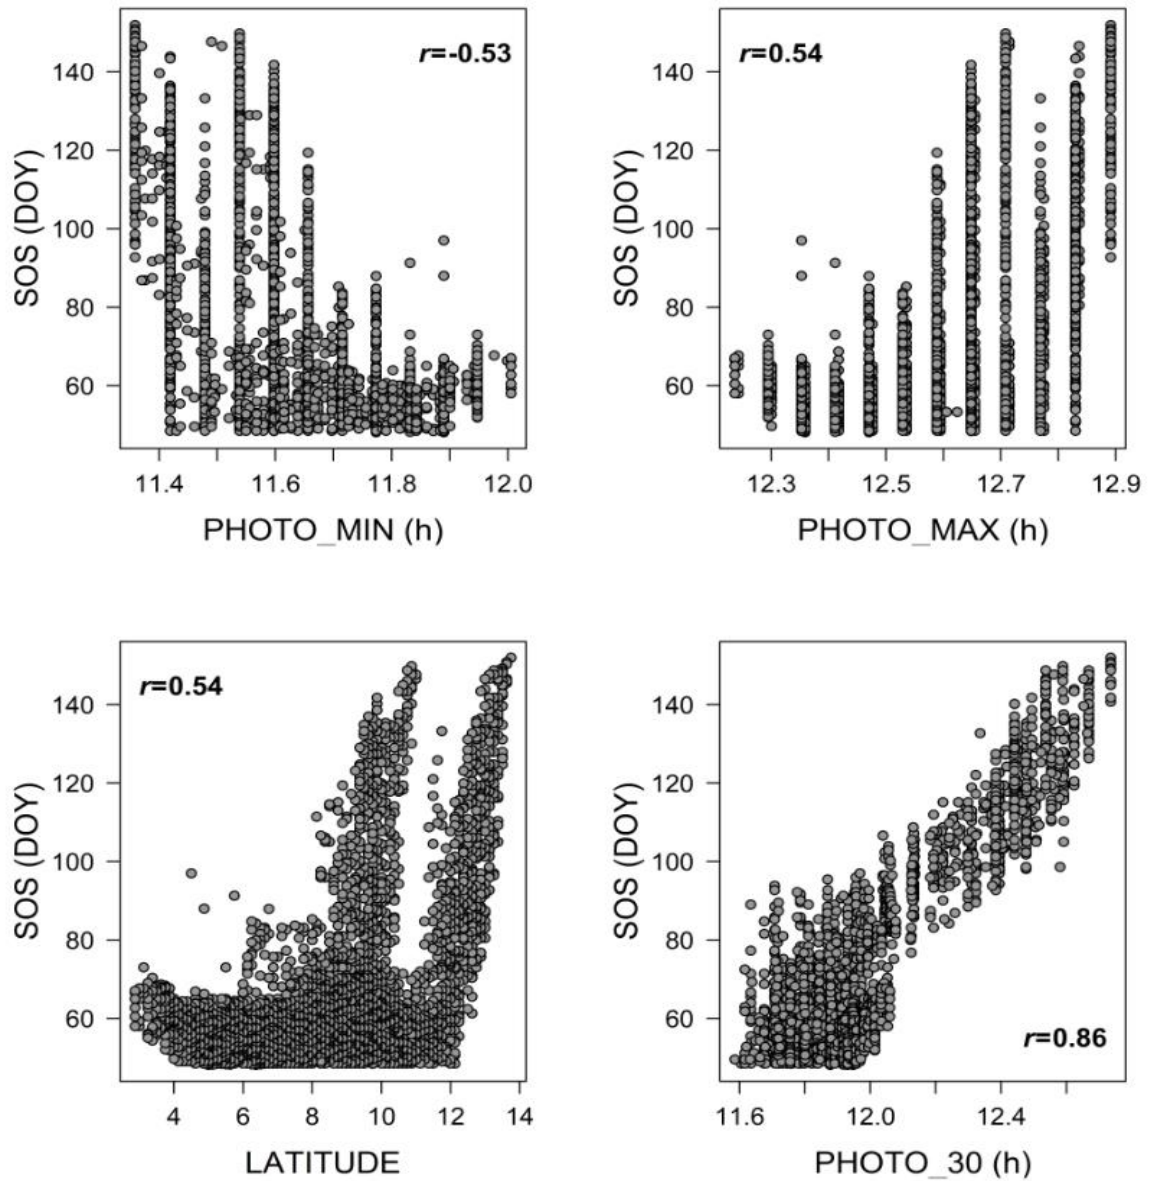

**Supplementary Figure 1:** Scatterplots between SOS and minimum and maximum photoperiod for the period 2001-to-2015, per degree increase in latitude, and 30 days pre-season photoperiod across woodlands in the Northern hemisphere of Africa.

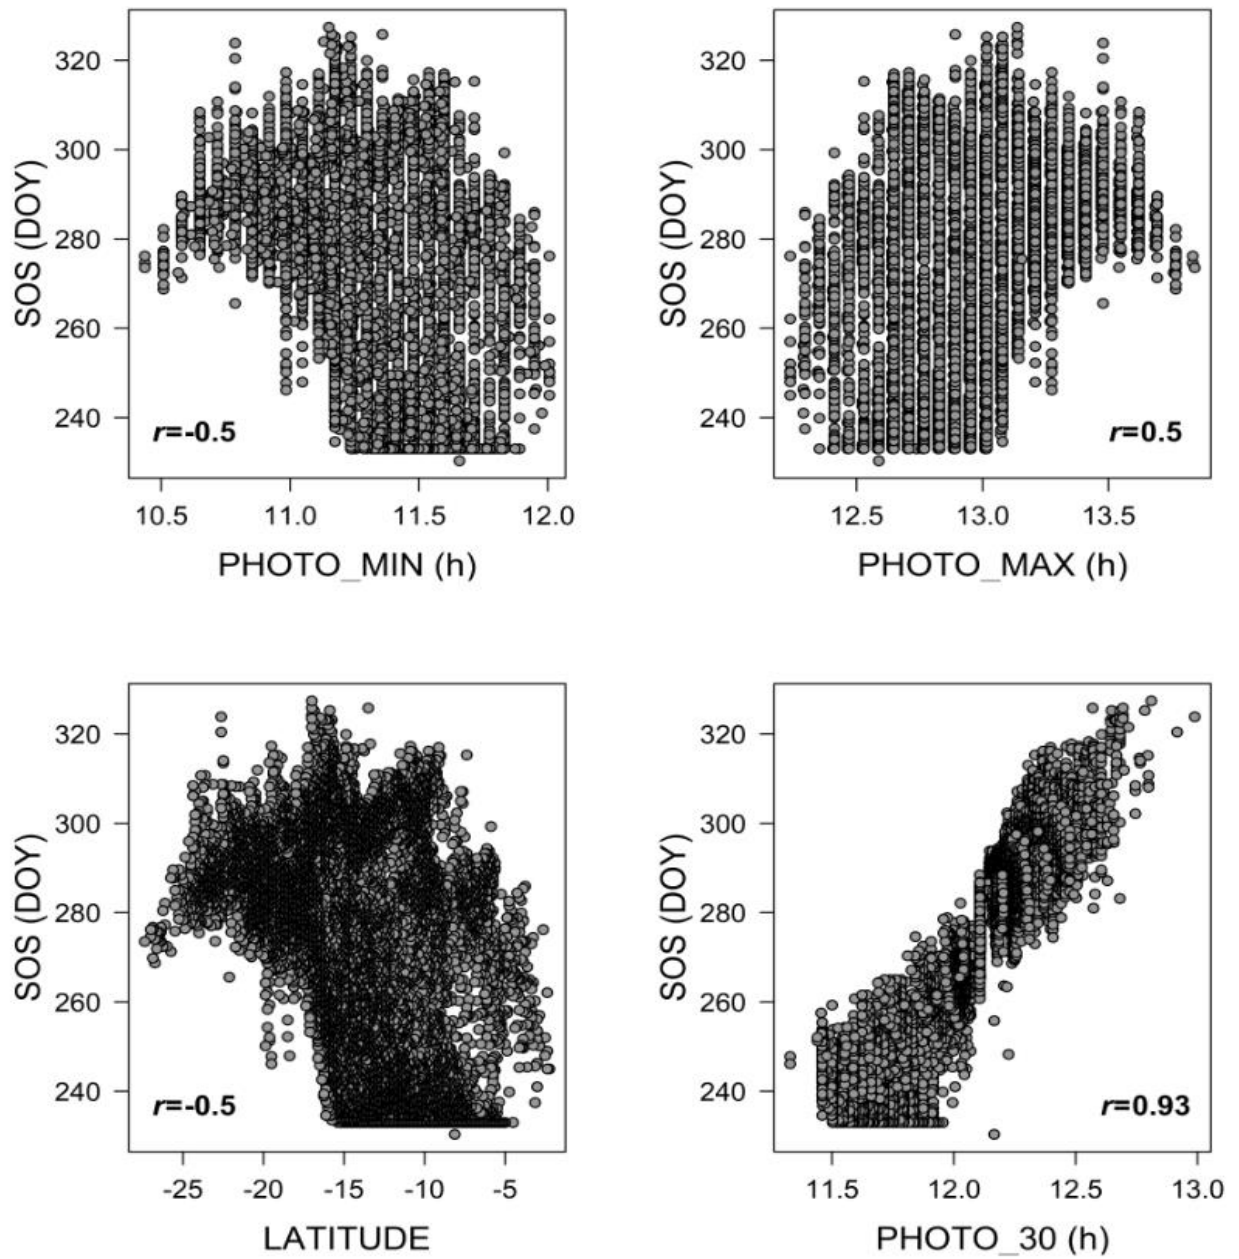

**Supplementary Figure 2:** Scatterplots between SOS and minimum and maximum photoperiod for the period 2001-to-2015, per degree increase in latitude, and 30 days pre-season photoperiod across woodlands in the southern hemisphere of Africa.

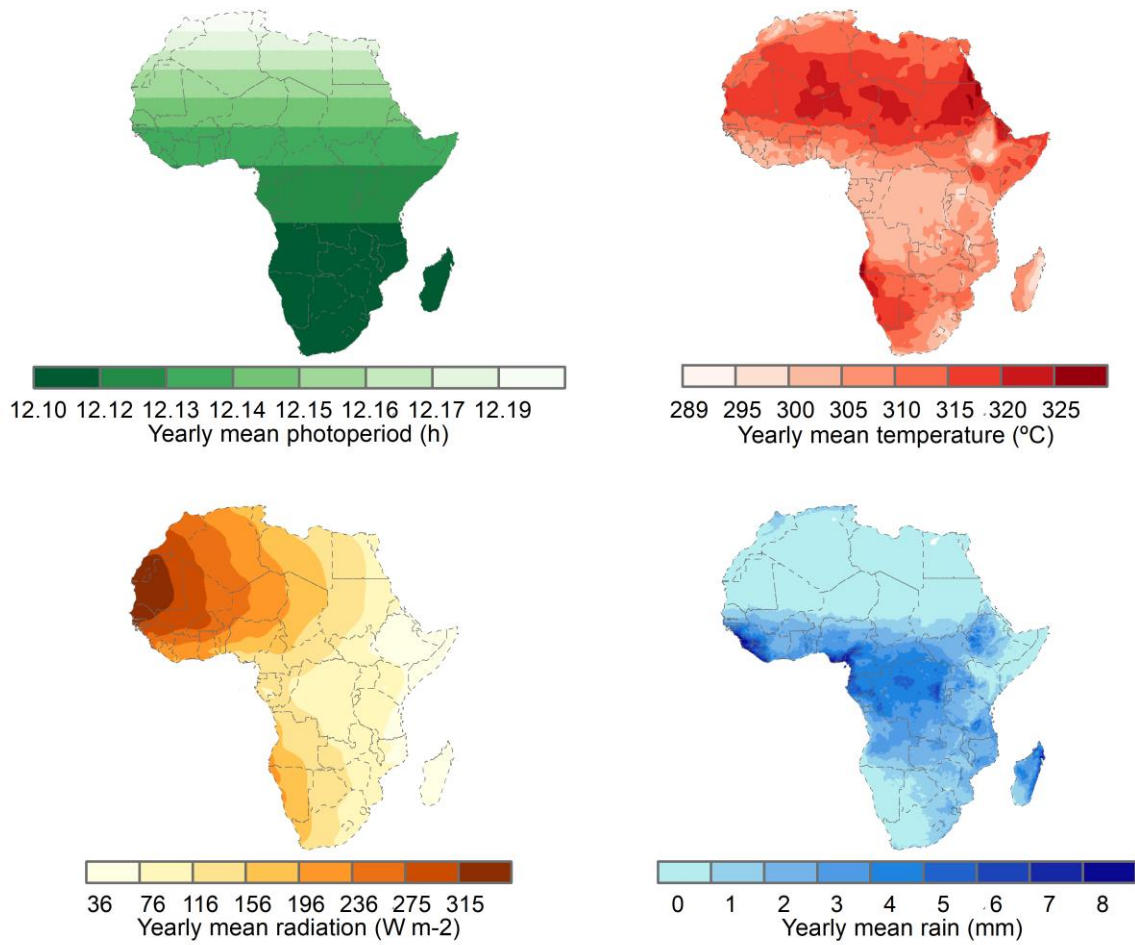

**Supplementary Figure 3:** Spatial distribution of 2016 yearly mean values of climatic factors.
